# Supplementary material
Source: PubMed Central journal article supplement (PMC2898907)
Supplement: NIHMS199806-supplement-01.pdf [file NIHMS199806-supplement-01.pdf]

## Supplementary Figures

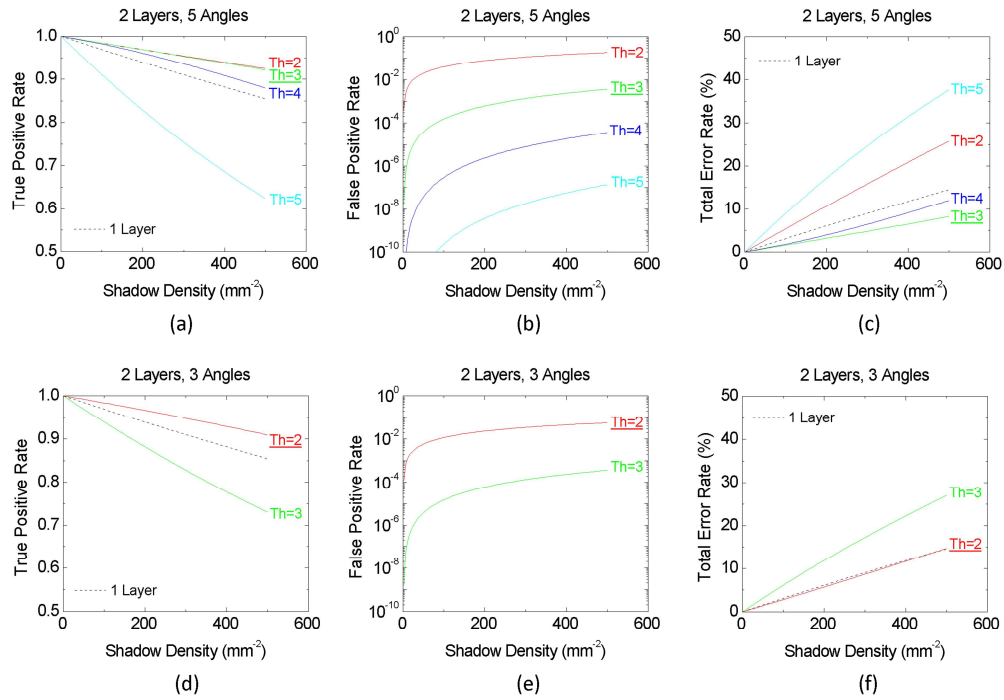

Fig. S1. Error rate characterization of the reported multi-angle algorithm for analyzing 2 vertical layers of cells with different illumination conditions and ray threshold values. (a) The true positive rate, (b) the false positive rate, and (c) the total error rate as a function of the shadow density at the sensor plane are reported for 5 illumination angles. In each image, the effect of the ray threshold value (denoted by  $Th$  - refer to Section 2) on our characterization accuracy is also quantified. (d), (e) and (f) report the same error characterization as a function of the imaging throughput for this time 3 illumination angles, rather than 5. The holographic shadow width of the cells at the sensor plane is assumed to be  $10\ \mu\text{m}$  for these calculations.

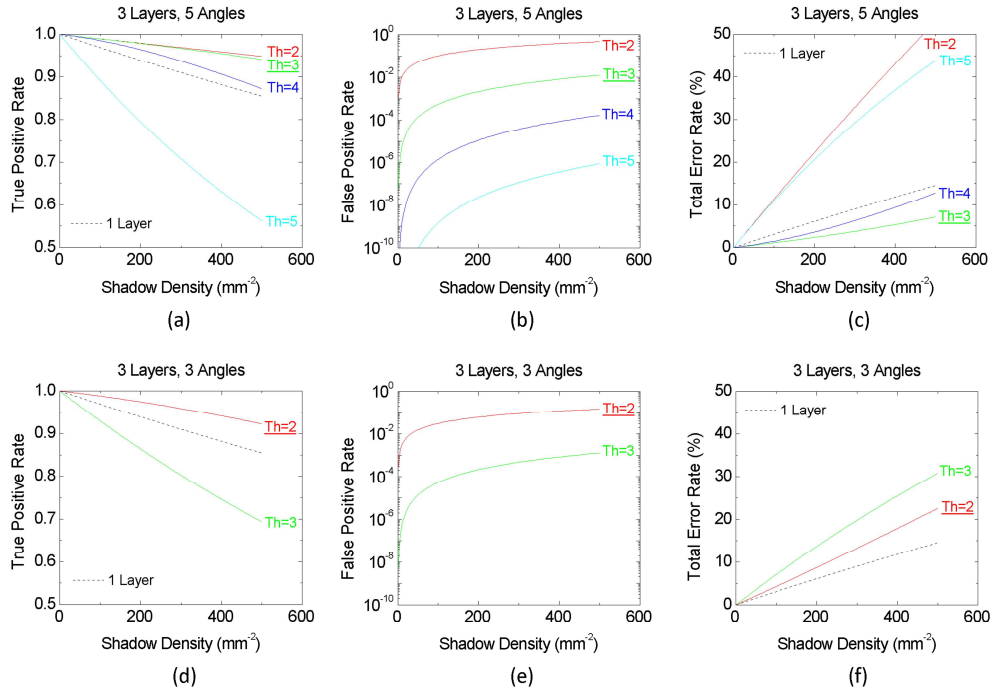

Fig. S2. Same as Supplementary Fig. S1, except that the error characterization results as a function of the imaging throughput are now reported for 3 vertical layers of cells with different illumination conditions and ray threshold values (Th).

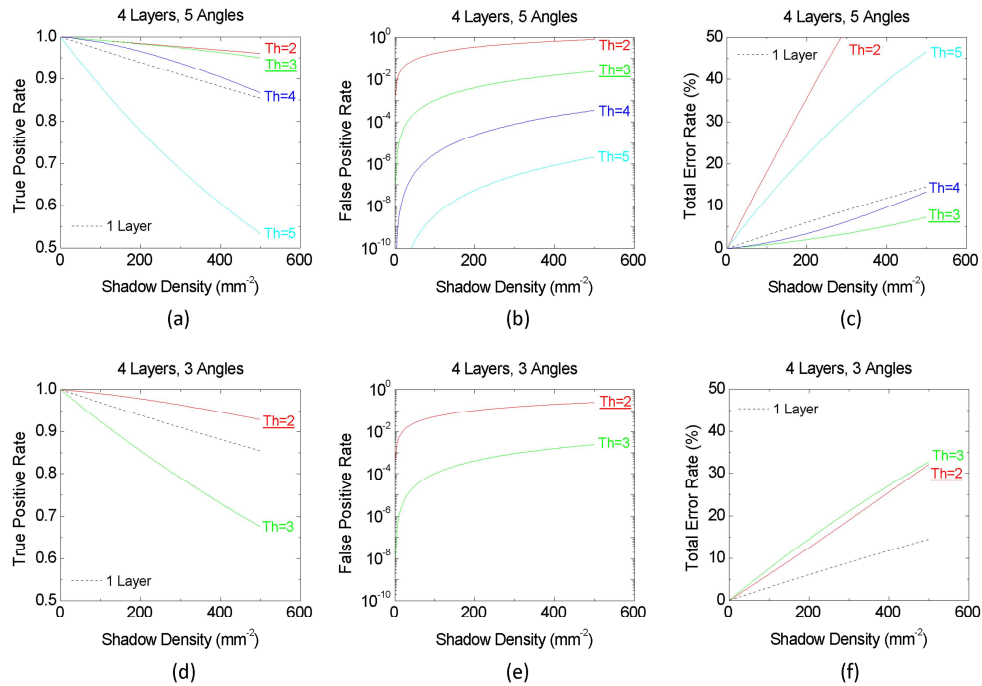

Fig. S3. Same as Supplementary Fig. S1, except that the error characterization results as a function of the imaging throughput are now reported for 4 vertical layers of cells with different illumination conditions and ray threshold values (Th).
